# Supplementary material for: Observation of giant spin-split Fermi-arc with maximal Chern number in the chiral topological semimetal PtGa
Source: PubMed Central journal article supplement (PMC7184610; doi:10.1038/s41467-020-15865-x), 2020-04-27
Supplement: 41467_2020_15865_MOESM1_ESM.pdf [file 41467_2020_15865_MOESM1_ESM.pdf]

## SUPPLEMENTARY INFORMATION

**Yao *et al.* Observation of giant spin-split Fermi-arc with maximal Chern number in the chiral topological semimetal PtGa**

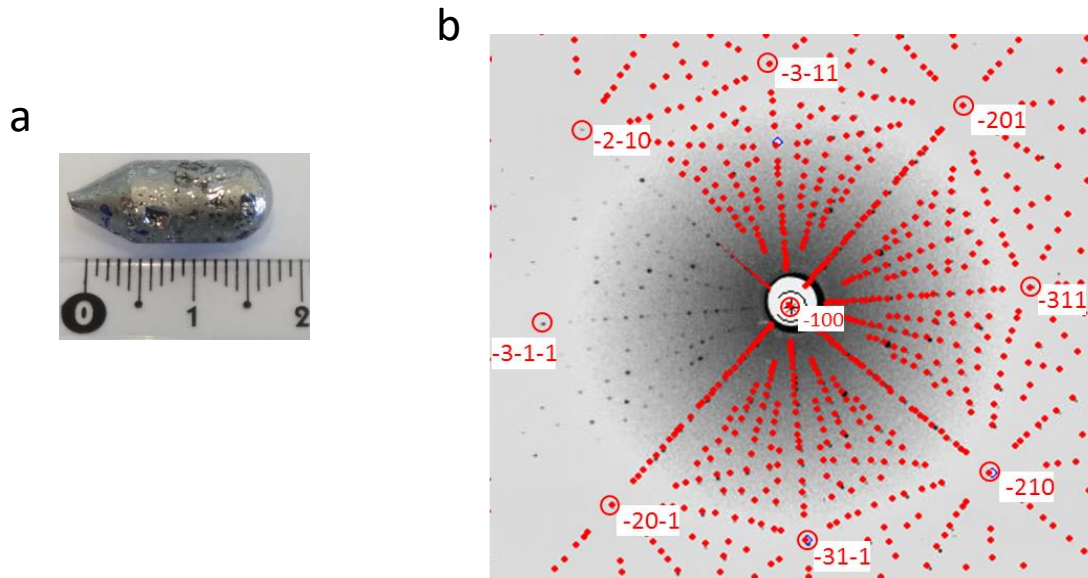

**Supplementary Figure 1 | Optical image and X-ray diffraction of crystal** (a) A optical picture of the as grown PtGa single crystal; (b) Representative Laue diffraction pattern of the [100] oriented PtGa single crystal superposed with the simulated pattern confirming high crystal quality.

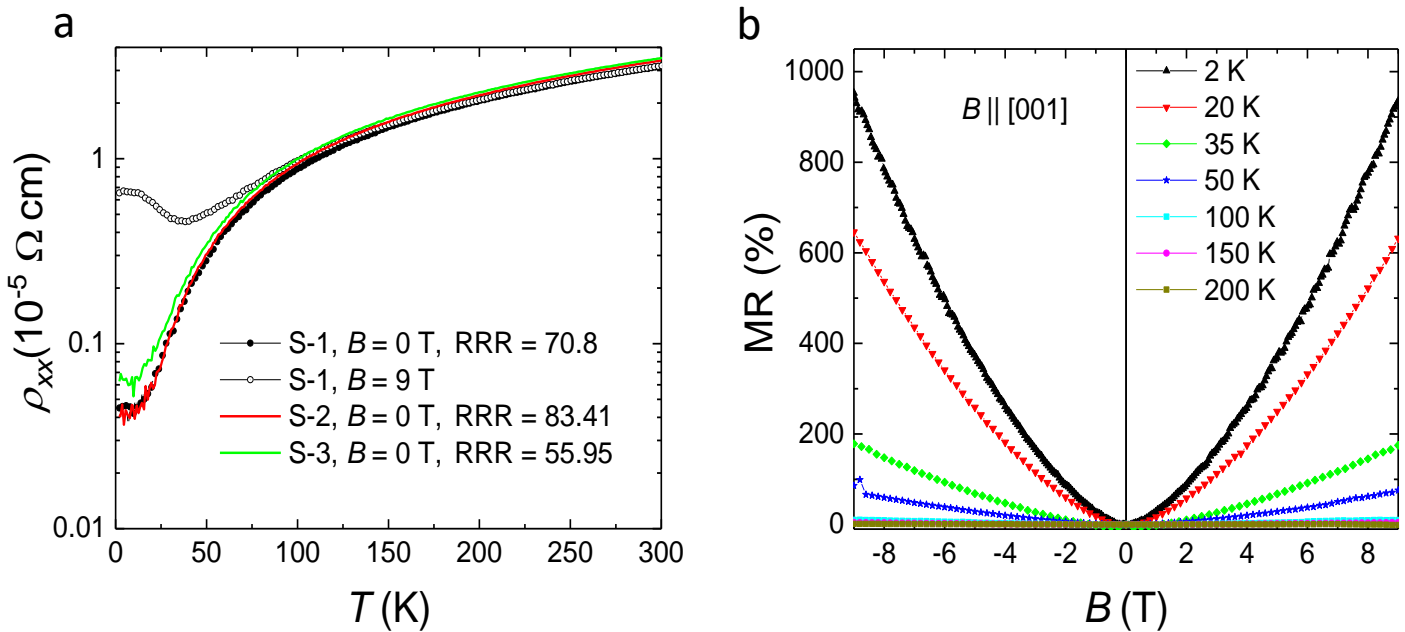

**Supplementary Figure 2 | Resistivity of PtGa.** (a) Temperature dependence of the longitudinal resistivity with current applied along the [100] direction of various batches of PtGa single crystals. For sample S-1, resistivity data with 9 T field applied along [001] are shown as well; (b) Giant magnetoresistance,  $[MR = [\rho(B) - \rho(0)] / \rho(0)]$  observed for sample S-1 at various temperatures.

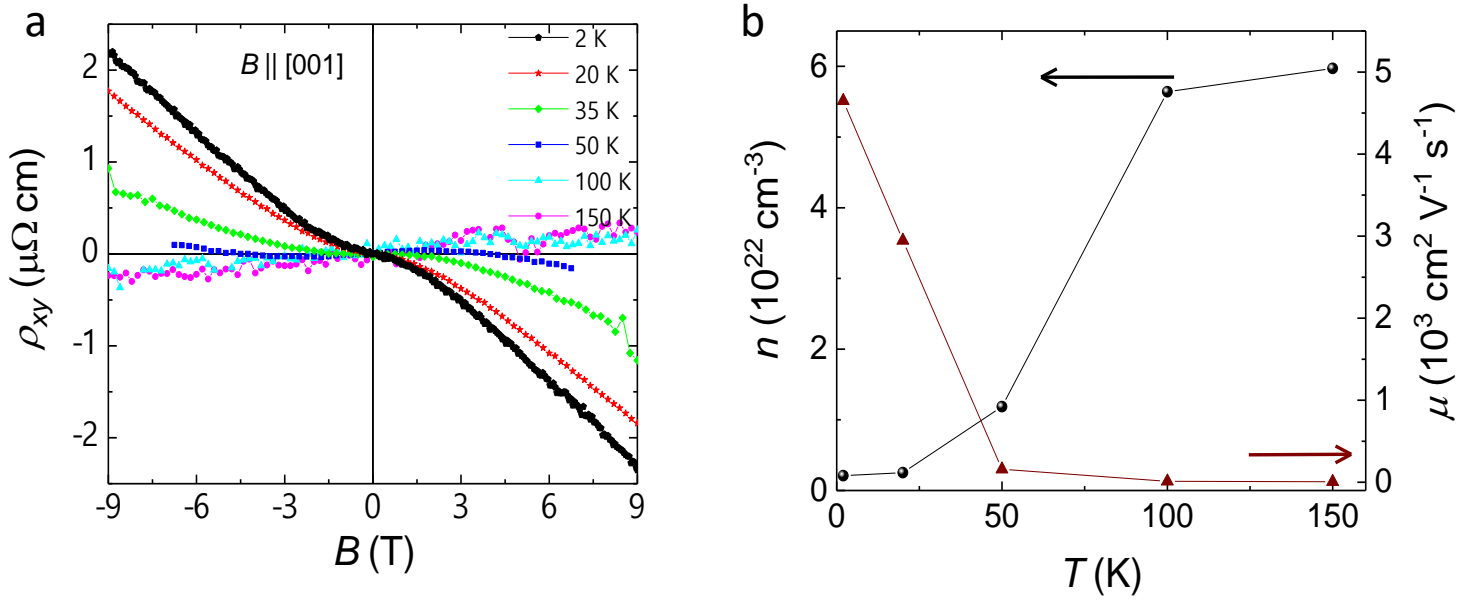

**Supplementary Figure 3 | Hall characteristics of PtGa.** (a) Magnetic-field dependence of Hall resistivity for sample S-1; (b) Carrier concentration and mobility estimated from high-field slope at various temperatures. For simplicity, a single-carrier Drude band model was used to estimate the charge-carrier density ( $n$ ) and mobility ( $\mu$ ) using  $n(T) = 1/[eR_H(T)]$  and  $\mu(T) = R_H(T) / \rho_{xx}(T)$ , where  $e$  denotes the electronic charge and  $R_H$  the Hall coefficient.

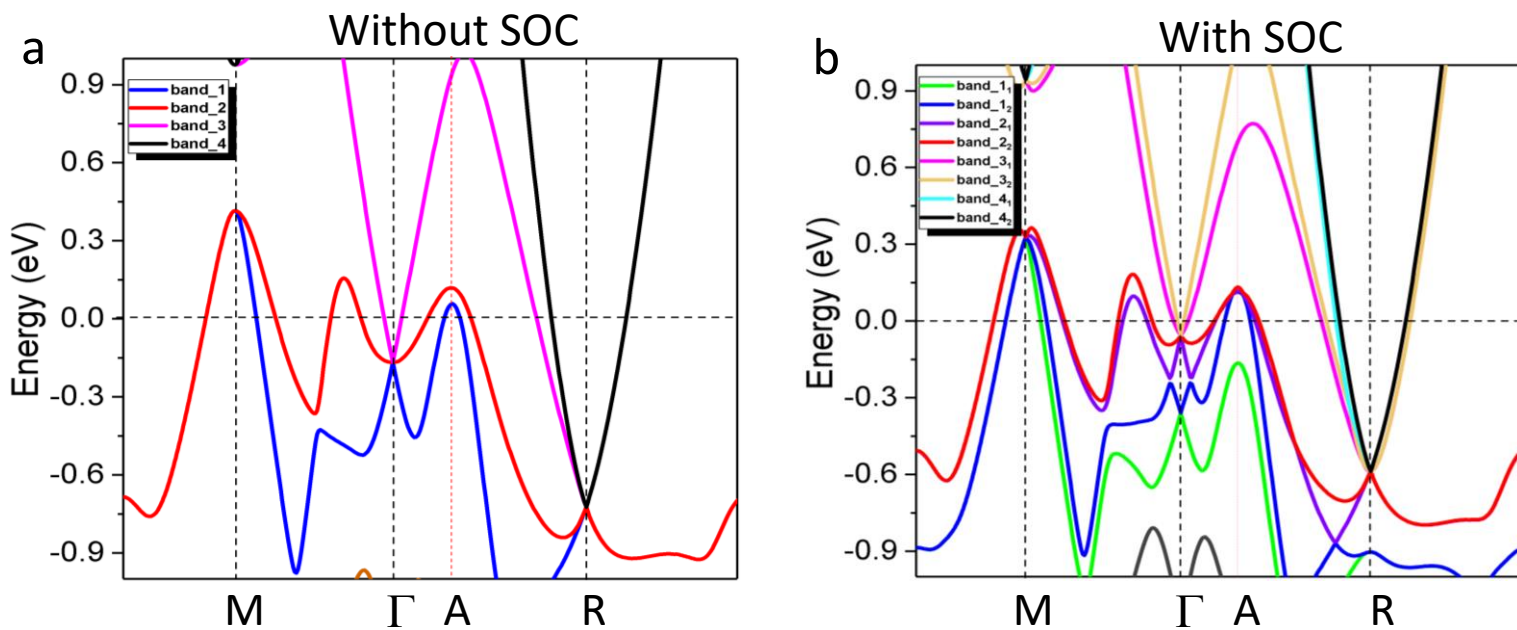

**Supplementary Figure 4** | Detailed band structure of PtGa without (a) and with (b) incorporation of spin-orbit coupling. Corresponding spin-split bands are highlighted with respective colors. There are three hole pockets along the high symmetry line of  $\Gamma$ -R. For convenient, we denote the center as point A.

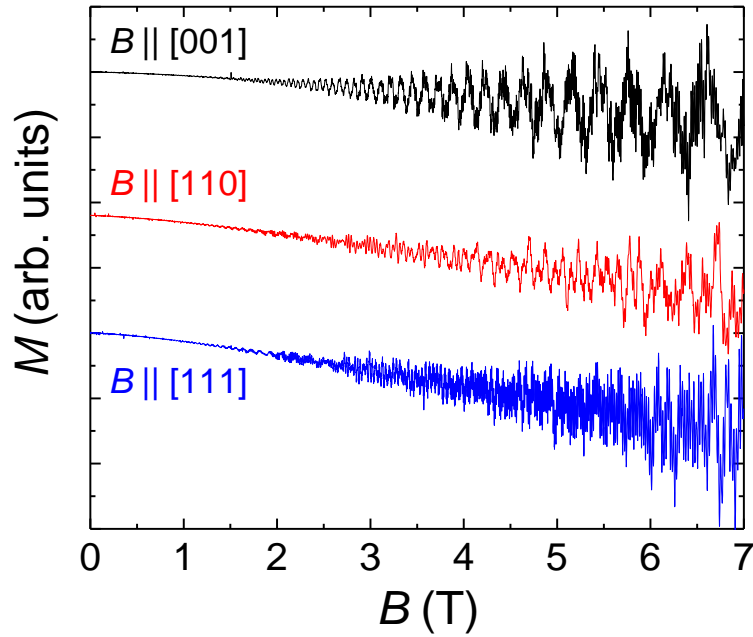

**Supplementary Figure 5 | de Haas–van Alphen quantum oscillations of PtGa.** Magnetization with superimposed quantum oscillations of sample S-1 with magnetic field applied along different directions—[001], [110], and [111].

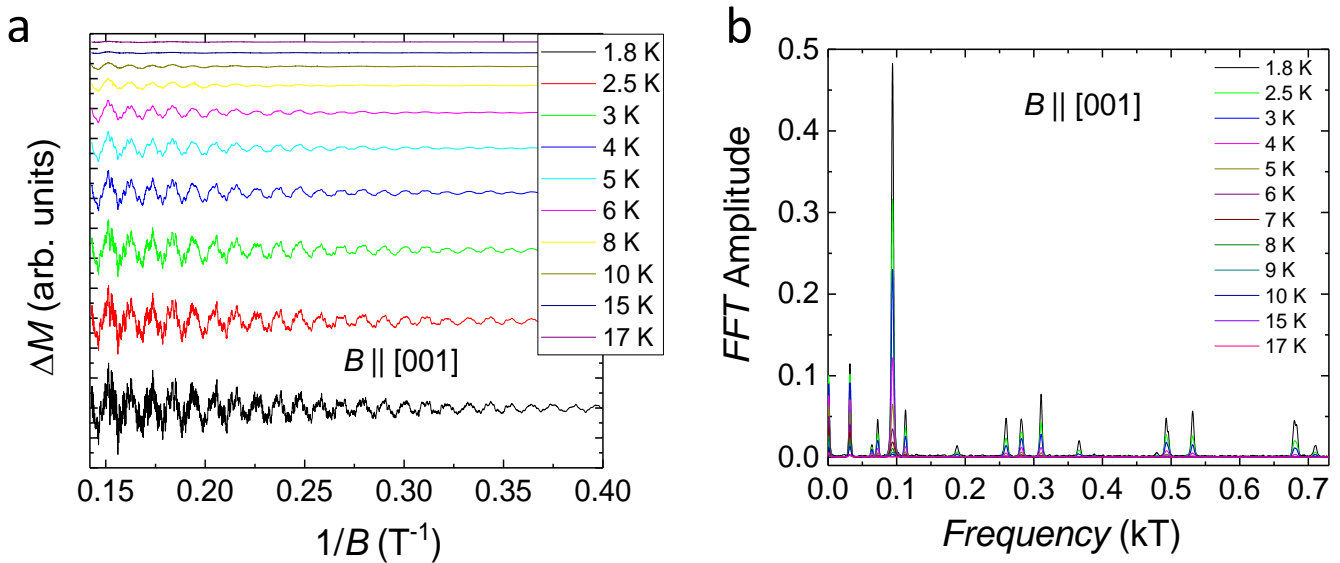

**Supplementary Figure 6 | Temperature dependence of (a) dHvA quantum oscillations in PtGa and (b) FFT spectra with  $B$  applied along the [001] direction. The corresponding inset shows a magnified high-frequency zone.**

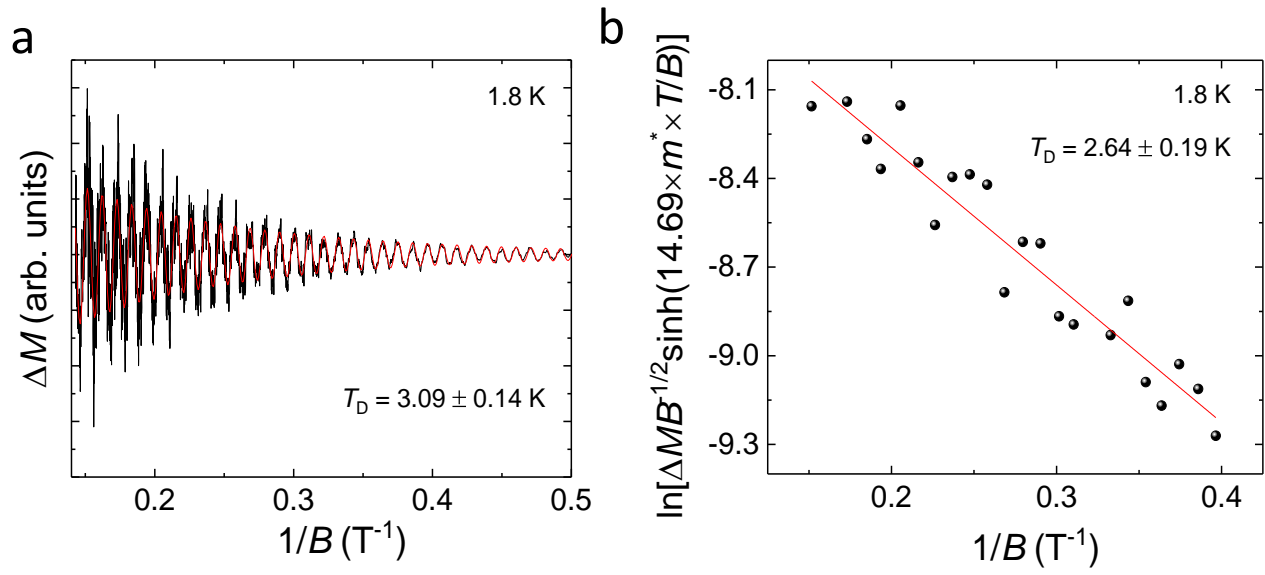

**Supplementary Figure 7 | Dingle temperature of PtGa.** (a) dHvA oscillations with fit using the Lifshitz–Kosevich formula for the dHvA frequency  $\alpha_2 = 93.96$  T while  $B \parallel [001]$ ; (b) Dingle plot of the FFT amplitude for the dHvA frequency  $\alpha_2 = 93.96$  T by choosing overlapping field windows with constant width in  $1/B$ . The Dingle temperature ( $T_D$ ) estimated from both methods demonstrates good agreement.

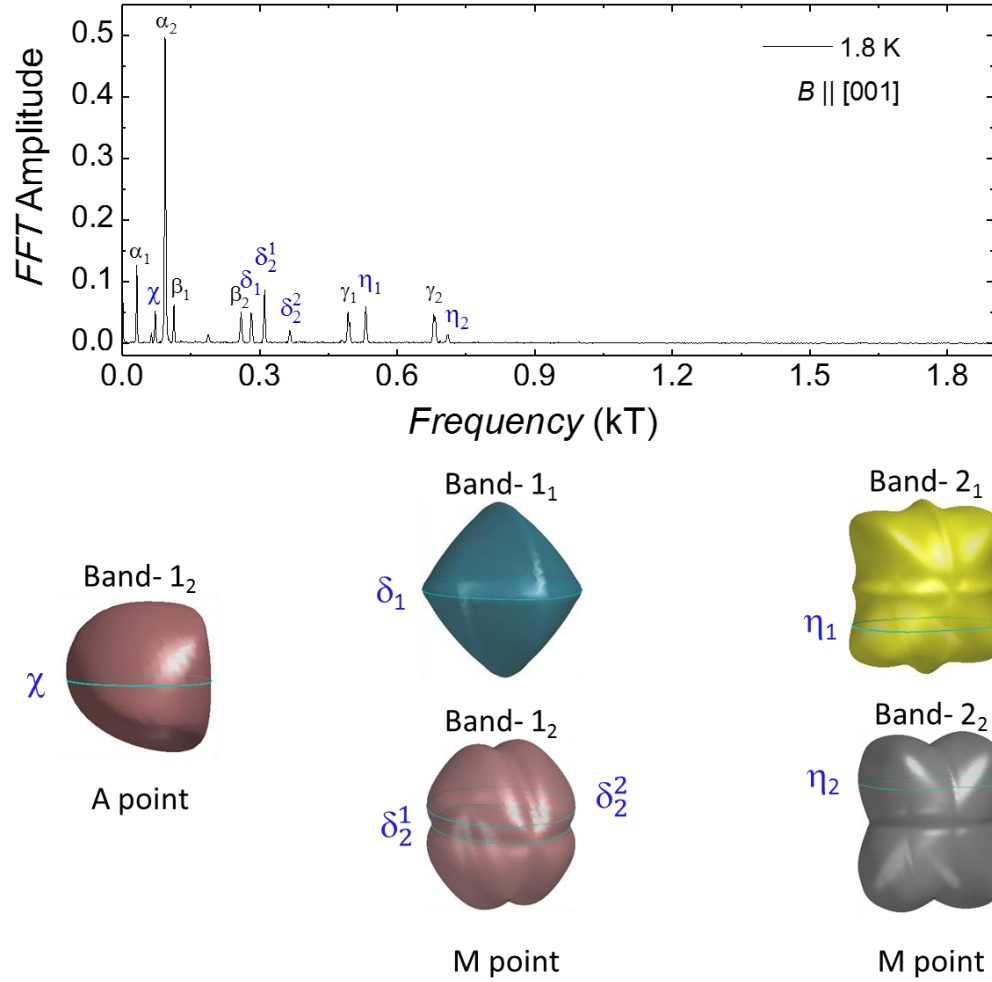

**Supplementary Figure 8** | Additional spin-split Fermi pockets with identified extremal areas at different points of the Brillouin zone for different bands as shown in Fig. S-4. The corresponding frequencies are indicated in the FFT spectrum of the dHvA oscillations in the upper panel.

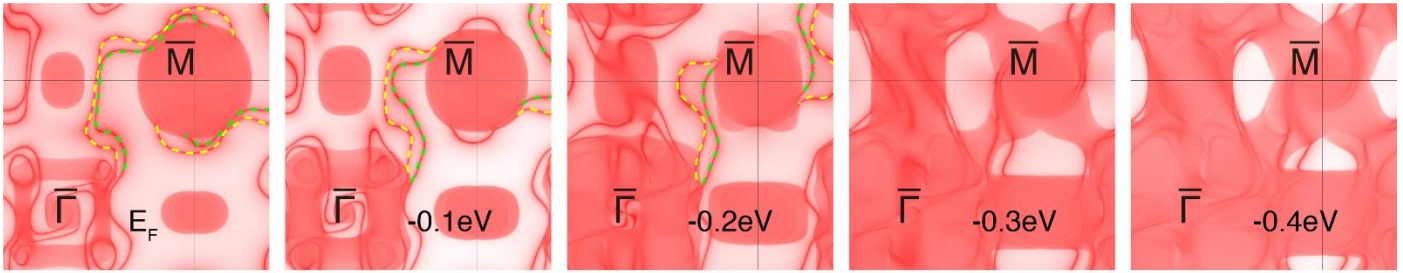

**Supplementary Figure 9** | Calculated constant energy maps with different binding energies,  $\Delta E = E - E_F = -0.1, -0.2, -0.3,$  and  $-0.4$  eV, respectively. The Fermi arcs are highlighted by yellow and green dashed lines.

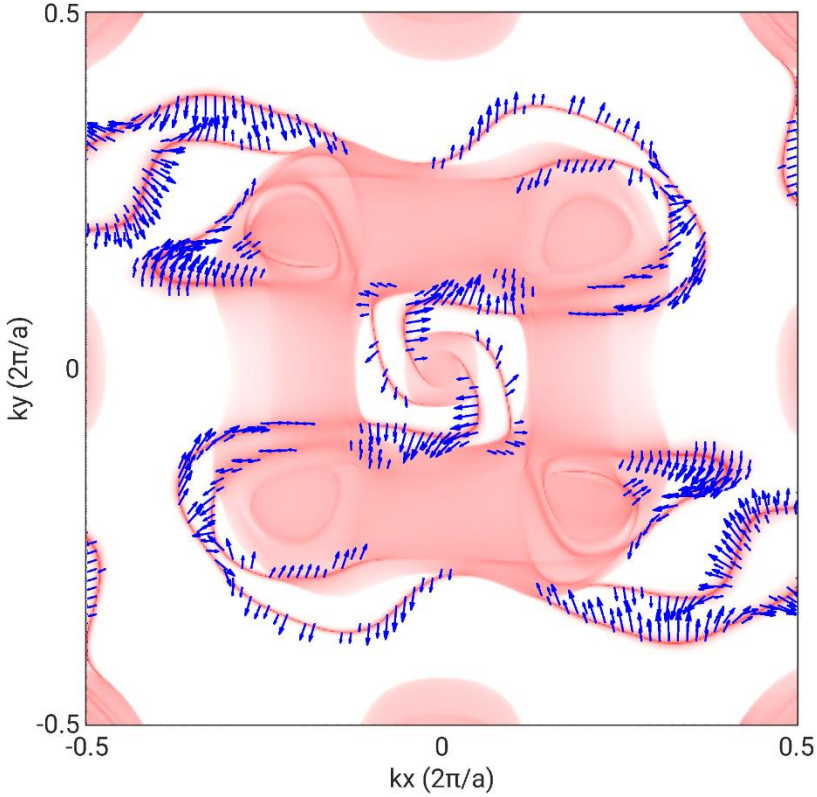

**Supplementary Figure 10** | **Spin-split Fermi arc of PtGa.** Calculated spin texture of the surface state at  $\Delta E = E - E_F = -0.1$  eV.



**Supplementary Table 1** | Room-temperature single-crystal refinement result for PtGa.

| Compound                                                              | PtGa                |
|-----------------------------------------------------------------------|---------------------|
| F.W. (g/mol);                                                         | 264.81              |
| Space group; $Z$                                                      | $P2_13$ (No.198); 4 |
| $a$ (Å)                                                               | 4.9114(3)           |
| $V$ (Å <sup>3</sup> )                                                 | 118.47(2)           |
| Absorption Correction                                                 | Multi-scan          |
| Extinction Coefficient                                                | 0.015(2)            |
| $\theta$ range (deg)                                                  | 5.9-35.7            |
| No. reflections; $R_{\text{int}}$                                     | 1252; 0.0320        |
| No. independent reflections                                           | 188                 |
| No. parameters                                                        | 8                   |
| $R_1$ ; $wR_2$ (all $I$ )                                             | 0.0213; 0.0430      |
| Goodness of fit                                                       | 1.082               |
| Fourier difference peak and hole<br>(e <sup>-</sup> /Å <sup>3</sup> ) | 2.432; -1.764       |

**Supplementary Table 2** | Oscillation frequency  $F$ , effective mass  $m^*$ , extremal cross-sectional areas  $A_F$ , Fermi wave vector  $k_F$  and Fermi velocity  $v_F$  of the Fermi-surface pockets as depicted in the inset of Fig. 2(d). The analysis is performed by describing the temperature-dependent FFT amplitudes of the corresponding frequencies with the Lifshitz–Kosevich formula and the Onsager relations given in the main text.

|            | $F$ (T) | $m^*/m_0$ | $A_F$ (Å <sup>-2</sup> ) | $k_F$ (Å <sup>-1</sup> ) | $v_F$ (m/s)<br>( $\times 10^5$ ) |
|------------|---------|-----------|--------------------------|--------------------------|----------------------------------|
| $\alpha_1$ | 31.9    | 0.06      | 0.003                    | 0.03                     | 7.21                             |
| $\alpha_2$ | 93.96   | 0.12      | 0.009                    | 0.053                    | 5.33                             |
| $\beta_1$  | 112.84  | 0.13      | 0.011                    | 0.058                    | 5.42                             |
| $\beta_2$  | 259.4   | 0.17      | 0.025                    | 0.089                    | 6.05                             |
| $\gamma_1$ | 492.6   | 0.14      | 0.047                    | 0.122                    | 9.84                             |
| $\gamma_2$ | 679.37  | 0.19      | 0.065                    | 0.144                    | 8.76                             |

**Supplementary Note 1** | Structural characterization of PtGa single crystal:

The single crystal diffraction data were collected on a Rigaku AFC7 four-circle diffractometer with a Saturn 724+ CCD-detector applying graphite-monochromatized Mo-K $\alpha$  radiation. Small crystal pieces were broken from the big chunk and the fragments were mounted on Kapton loops for the data collection. The final refinement details are given in Table-S1. The complete crystallographic information has been deposited and is available citing CSD-1991900.
